# Supplementary material for: Influence of Genetic Polymorphisms on the Age at Cancer Diagnosis in a Homogenous Lynch Syndrome Cohort of Individuals Carrying the MLH1:c.1528C>T South African Founder Variant
Source: MDPI journal article supplement (doi:10.3390/biomedicines12102201), 2024-09-27
Supplement: s1 [file Supplementary Figure S1.pdf › Supplementary Figure S1.pdf]

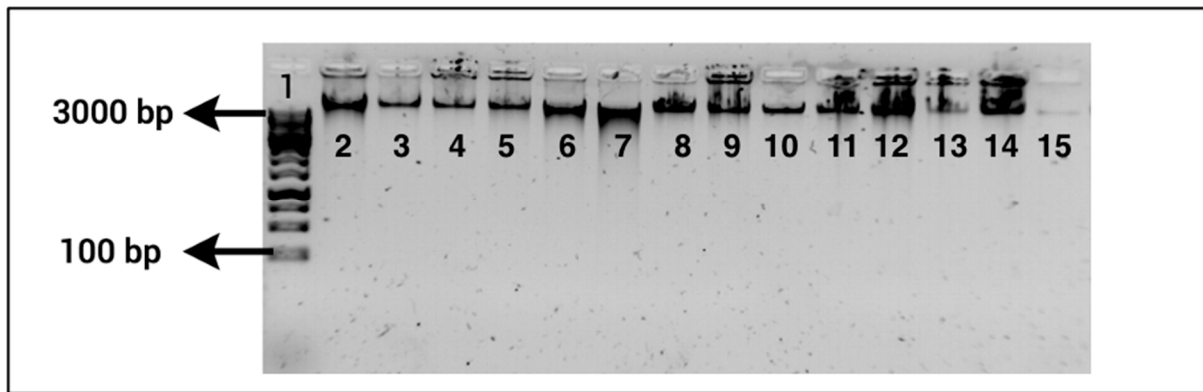

**Supplementary Figure S1.** DNA integrity assessment by agarose gel electrophoresis. The integrity of the retrieved gDNA samples was analysed by agarose gel electrophoresis. Three microlitres of each DNA sample was loaded onto a 1% agarose gel. Lane 1 shows a 100 bp Plus DNA ladder with a 100 bp to 3000 bp size range. Lanes 2 to 15 show intact retrieved gDNA samples, which were then included in the study. Lane 16 shows a degraded retrieved gDNA sample, which was excluded from the study. The image was captured using the UVIpro Gold Transilluminator gel documentation system.
