# Supplementary material for: Influence of Genetic Polymorphisms on the Age at Cancer Diagnosis in a Homogenous Lynch Syndrome Cohort of Individuals Carrying the MLH1:c.1528C>T South African Founder Variant
Source: MDPI journal article supplement (doi:10.3390/biomedicines12102201), 2024-09-27
Supplement: s1 [file Supplementary Figure S3.pdf › Supplementary Figure S3.pdf]

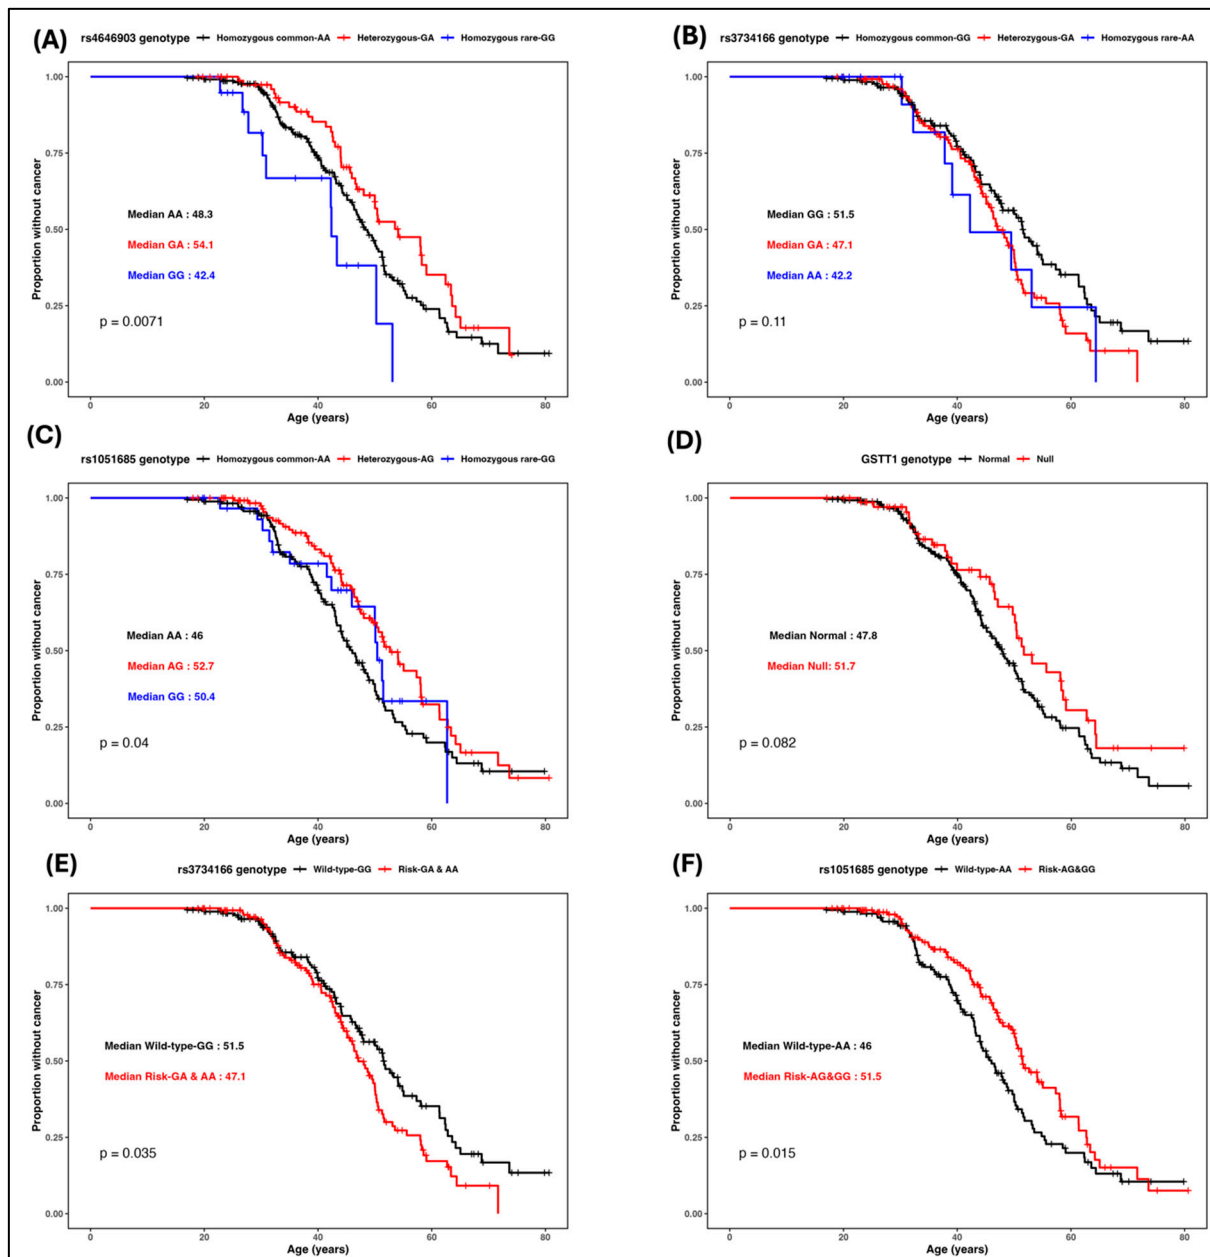

**Supplementary Figure S3.** Kaplan-Meier survival plots by *CYP1A1* rs4646903, *CDC25C* rs3734166, *XRCC5* rs1051685, *GSTT1*, *CDC25C* rs3734166 (GA+AA), and *XRCC5* rs1051685 (AG+GG) polymorphisms in Lynch syndrome variant heterozygotes (LSVH). These plots illustrate the effect of polymorphism genotypes on the age of LS cancer diagnosis in LSVH. (A) *CYP1A1* rs4646903 genotypes (AA, AG, and GG); (B) *CDC25C* rs3734166 (GG, GA, and AA); (C) *XRCC5* rs1051685 genotypes (AA, AG, and GG); (D) *GSTT1* genotypes (Normal and Null); (E) *CDC25C* rs3734166 Additive (GG, and GA+AA); (F) *XRCC5* rs1051685 genotypes (AA, and AG + GG)
