# Supplementary material for: Influence of Genetic Polymorphisms on the Age at Cancer Diagnosis in a Homogenous Lynch Syndrome Cohort of Individuals Carrying the MLH1:c.1528C>T South African Founder Variant
Source: MDPI journal article supplement (doi:10.3390/biomedicines12102201), 2024-09-27
Supplement: s1 [file Supplementary Table S1.pdf › Supplementary Table S1.pdf]

**Supplementary Table S1.** List of genetic polymorphisms examined in the study.

| <b>Polymorphism</b>                 | <b>Consequence type*</b>           | <b>Regulatory feature consequences*</b> | <b>Regulatory Feature type</b>    | <b>Source (studies DOI number)</b>                                                                                                                                                                                                                                                                                                            |
|-------------------------------------|------------------------------------|-----------------------------------------|-----------------------------------|-----------------------------------------------------------------------------------------------------------------------------------------------------------------------------------------------------------------------------------------------------------------------------------------------------------------------------------------------|
| <i>CYP1A1</i><br>I462V<br>rs1048903 | non coding transcript exon variant | Not available                           | Not available                     | <a href="https://doi.org/10.1158/1055-9965.Epi-08-0326">https://doi.org/10.1158/1055-9965.Epi-08-0326</a><br><a href="https://doi.org/10.1158/1055-9965.Epi-06-0040">https://doi.org/10.1158/1055-9965.Epi-06-0040</a>                                                                                                                        |
| <i>CYP1A1</i><br>Msp1<br>rs4646903  | intergenic variant                 | Not available                           | Gene expression                   | <a href="https://doi.org/10.1158/1055-9965.Epi-08-0326">https://doi.org/10.1158/1055-9965.Epi-08-0326</a><br><a href="https://doi.org/10.1158/1055-9965.Epi-06-0040">https://doi.org/10.1158/1055-9965.Epi-06-0040</a><br><a href="https://doi.org/10.1158/1078-0432.CCR-06-2987">https://doi.org/10.1158/1078-0432.CCR-06-2987</a>           |
| <i>CYP17</i><br>rs743572            | 5 prime UTR variant                | Regulatory region variant               | Enhancer                          | <a href="https://doi.org/10.1158/1078-0432.CCR-06-2987">https://doi.org/10.1158/1078-0432.CCR-06-2987</a>                                                                                                                                                                                                                                     |
| <i>hTERT</i><br>rs2075786           | intron variant                     | Not available                           | Not available                     | <a href="https://doi.org/10.1038/ejhg.2012.204">https://doi.org/10.1038/ejhg.2012.204</a>                                                                                                                                                                                                                                                     |
| <i>HFE</i> H63D<br>rs1799945        | missense variant                   | Not available                           | Not available                     | <a href="https://doi.org/10.1002/ijc.24304">https://doi.org/10.1002/ijc.24304</a>                                                                                                                                                                                                                                                             |
| <i>GSTM1</i>                        | gene deletion                      | Not available                           | Lack of enzyme activity           | <a href="https://doi.org/10.1016/j.mrfmmm.2006.09.004">https://doi.org/10.1016/j.mrfmmm.2006.09.004</a><br><a href="https://doi.org/https://doi.org/10.3892/or.10.2.483">https://doi.org/https://doi.org/10.3892/or.10.2.483</a><br><a href="https://doi.org/10.1016/s0016-5085(98)70017-4">https://doi.org/10.1016/s0016-5085(98)70017-4</a> |
| <i>GSTT1</i>                        | gene deletion                      | Not available                           | Lack of enzyme activity           | <a href="https://doi.org/10.1016/j.mrfmmm.2006.09.004">https://doi.org/10.1016/j.mrfmmm.2006.09.004</a><br><a href="https://doi.org/10.1016/s0016-5085(98)70017-4">https://doi.org/10.1016/s0016-5085(98)70017-4</a>                                                                                                                          |
| <i>TGFB1/CCD C97</i><br>rs12980942  | intron variant                     | Regulatory region variant               | Transcription Factor binding site | <a href="https://doi.org/10.1093/carcin/bgs344">https://doi.org/10.1093/carcin/bgs344</a>                                                                                                                                                                                                                                                     |

|                              |                                             |                                 |                                         |
|------------------------------|---------------------------------------------|---------------------------------|-----------------------------------------|
| <b>PPP2R2B</b><br>rs10477307 | intron<br>variant                           | Regulatory<br>region<br>variant | Enhancer                                |
| <b>KIF20A</b><br>rs10038448  | intron<br>variant                           | Regulatory<br>region<br>variant | CTCF_binding<br>_site                   |
| <b>CDC25C</b><br>rs3734166   | missense<br>variant                         | Not<br>available                | Not available                           |
| <b>XRCC5</b><br>rs1051685    | 3 prime<br>UTR<br>variant                   | Regulatory<br>region<br>variant | Enhancer                                |
| <b>TNF</b><br>rs3093662      | intron<br>variant                           | Not<br>available                | Not available                           |
| <b>BCL2</b><br>rs1531697     | intron<br>variant                           | Not<br>available                | Transcription<br>Factor binding<br>site |
| <b>TTC28</b><br>rs9608696    | intron<br>variant                           | Regulatory<br>region<br>variant | Enhancer                                |
| <b>CHFR</b><br>rs11610954    | intron<br>variant                           | Not<br>available                | Not available                           |
| <b>CDC25C</b><br>rs6874130   | Transcript<br>ion Factor<br>binding<br>site | Regulatory<br>region<br>variant | Enhancer                                |
| <b>ATM</b><br>rs1800057      | Missense<br>variant                         | Not<br>available                | Not available                           |
