# Supplementary material for: Influence of Genetic Polymorphisms on the Age at Cancer Diagnosis in a Homogenous Lynch Syndrome Cohort of Individuals Carrying the MLH1:c.1528C>T South African Founder Variant
Source: MDPI journal article supplement (doi:10.3390/biomedicines12102201), 2024-09-27
Supplement: s1 [file Supplementary Table S2.pdf › Supplementary Table S2.pdf]

**Supplementary Table S2.** Primer sequences for the PCR amplification of the GSTM1 and GSTT1 polymorphisms

| Primer           | Sequence                         | Size of PCR fragment (bp) |
|------------------|----------------------------------|---------------------------|
| <b>GSTT1F</b>    | TTCCTTACTGGTCCTCACATCTC          | 461                       |
| <b>GSTT1R</b>    | TCACCGGATCATGGCCAGCA             |                           |
| <b>GSTM1F</b>    | GAA CTC CCT GAA AAG CTA AAG<br>C | 215                       |
| <b>GSTM1R</b>    | GTT GGG CTC AAA TAT ACG GTG<br>G |                           |
| <b>β-GlobinF</b> | CAA CTT CAT CCA CGT TCA CC       | 268                       |
| <b>β-GlobinR</b> | GAA GAG CCA AGG ACA GGT AC       |                           |
