# Supplementary material for: Influence of Genetic Polymorphisms on the Age at Cancer Diagnosis in a Homogenous Lynch Syndrome Cohort of Individuals Carrying the MLH1:c.1528C>T South African Founder Variant
Source: MDPI journal article supplement (doi:10.3390/biomedicines12102201), 2024-09-27
Supplement: s1 [file Supplementary Table S3.pdf › Supplementary Table S3.pdf]

**Supplementary Table S3.** Genotype frequency distribution and HWE analysis for SNPs in LSVH cohort. Note: Significant SNP is in Bold. Abbreviations: SNP: Single nucleotide polymorphism, HWE: Hardy-Weinberg equilibrium (HWE).

| SNP                     | MAF (dbSNP Overall/Africa n) | Observed genotype (N) | Cancer affected | Cancer unaffected | HWE   |
|-------------------------|------------------------------|-----------------------|-----------------|-------------------|-------|
| HFE H63D rs1799945      | G=0.073/G=0.011              |                       |                 |                   |       |
| CC                      |                              | 277                   | 134             | 143               | 0.857 |
| CG                      |                              | 56                    | 26              | 30                |       |
| CT                      |                              | 2                     | 1               | 1                 |       |
| GG                      |                              | 2                     | 1               | 1                 |       |
| Missing                 |                              | 3                     | 1               | 2                 |       |
| CYP17 rs743572          | G=0.411/G=0.326 & T=0.000    |                       |                 |                   |       |
| AA                      |                              | 68                    | 35              | 33                | 0.074 |
| AG                      |                              | 156                   | 81              | 75                |       |
| GG                      |                              | 60                    | 24              | 36                |       |
| GT                      |                              | 23                    | 13              | 10                |       |
| AT                      |                              | 32                    | 10              | 22                |       |
| TT                      |                              | 1                     | 0               | 1                 |       |
| hTERT rs2075786         | G=0.434/G=0.421              |                       |                 |                   |       |
| AA                      |                              | 108                   | 48              | 60                | 0.250 |
| GA                      |                              | 161                   | 82              | 79                |       |
| GG                      |                              | 70                    | 33              | 37                |       |
| Missing                 |                              | 1                     | 0               | 1                 |       |
| PPP2R2B rs10477307      | A=0.274/A=0.490              |                       |                 |                   |       |
| GG                      |                              | 129                   | 70              | 59                | 0.128 |
| GA                      |                              | 166                   | 72              | 94                |       |
| AA                      |                              | 43                    | 20              | 23                |       |
| Missing                 |                              | 2                     | 1               | 1                 |       |
| KIF20A rs10038448       | C=0.668/C=0.679              |                       |                 |                   |       |
| CC                      |                              | 213                   | 99              | 114               | 0.680 |
| GC                      |                              | 112                   | 57              | 55                |       |
| GG                      |                              | 15                    | 7               | 8                 |       |
| TGFB1/CCDC97 rs12980942 | A=0.133/A=0.051              |                       |                 |                   |       |
| GG                      |                              | 289                   | 145             | 144               | 0.628 |
| GA                      |                              | 46                    | 15              | 31                |       |
| AA                      |                              | 4                     | 3               | 1                 |       |
| Missing                 |                              | 1                     | 0               | 1                 |       |
| XRCC5 rs1051685         | G=0.172/G=0.334              |                       |                 |                   |       |
| AA                      |                              | 176                   | 90              | 86                | 0.852 |

|             |              |     |     |     |       |
|-------------|--------------|-----|-----|-----|-------|
| AG          |              | 132 | 58  | 74  |       |
| GG          |              | 32  | 15  | 17  |       |
| TNF         | G=0.080/G=   |     |     |     |       |
| rs3093662   | 0.077        | 273 | 136 | 137 | 0.723 |
| AA          |              | 62  | 26  | 36  |       |
| AG          |              | 4   | 1   | 3   |       |
| GG          |              | 1   | 0   | 1   |       |
| Missing     |              |     |     |     |       |
| BCL2        | A=0.289/A=   |     |     |     |       |
| rs1531697   | 0.208        | 168 | 76  | 92  | 0.355 |
| TT          |              | 139 | 72  | 67  |       |
| TA          |              | 31  | 14  | 17  |       |
| AA          |              | 2   | 1   | 1   |       |
| Missing     |              |     |     |     |       |
| CHFR        | T=0.059/     |     |     |     |       |
| rs11610954  | T=0.000      |     |     |     |       |
| CC          |              | 291 | 137 | 154 | 0.024 |
| CT          |              | 43  | 23  | 20  |       |
| TT          |              | 6   | 3   | 3   |       |
| CDC25C      | C=0.378/     |     |     |     |       |
| rs6874130   | C=0.478      |     |     |     |       |
| GG          |              | 104 | 48  | 56  | 0.162 |
| GC          |              | 183 | 88  | 95  |       |
| CC          |              | 53  | 27  | 26  |       |
| ATM         | G=0.009/     |     |     |     |       |
| rs1800057   | G=0.0008     | 330 | 155 | 175 | 0.940 |
| CC          |              | 10  | 8   | 2   |       |
| CG          |              |     |     |     |       |
| CYP1A1 Msp1 | G=0.293/     |     |     |     |       |
| rs4646903   | G=0.235      |     |     |     |       |
| AA          |              | 230 | 112 | 118 | 0.100 |
| AG          |              | 85  | 40  | 45  |       |
| GG          |              | 19  | 10  | 9   |       |
| Missing     |              | 6   | 1   | 5   |       |
| TTC28       | *G=0.000031/ |     |     |     |       |
| rs9608696   | G=0.000      |     |     |     |       |
| TT          |              | 329 | 156 | 173 | NA    |
| GG          |              | 0   | 0   | 0   |       |
| Missing     |              | 11  | 7   | 4   |       |
| CDC25C      | A=0.390/     |     |     |     |       |
| rs3734166   | A=0.477      |     |     |     |       |
| GG          |              | 185 | 77  | 108 | 0.244 |
| GA          |              | 133 | 76  | 57  |       |
| AA          |              | 20  | 8   | 12  |       |
| Missing     |              | 2   | 2   | 0   |       |

\*Allele frequency obtain from gnomAD database, the rest are from the 1000 Genomes.
