# Supplementary material for: Influence of Genetic Polymorphisms on the Age at Cancer Diagnosis in a Homogenous Lynch Syndrome Cohort of Individuals Carrying the MLH1:c.1528C>T South African Founder Variant
Source: MDPI journal article supplement (doi:10.3390/biomedicines12102201), 2024-09-27
Supplement: s1 [file Supplementary Table S4.pdf › Supplementary Table S4.pdf]

**Supplementary Table S4.** Comparison of Kaplan-Meier survival by genotype, univariate and sex-adjusted (as confounder) Cox regression analysis by genotype for any cancer. Note: Significant polymorphism genotypes are in Bold. Abbreviations: HR: Hazards Ratio, CI: Confidence Interval, Ref: Reference genotype.

| Polymorphism             | Genotype (N) | Cancer affected (N) | Log-rank test P | Univariate HR (95% CI) | P-value | *Adjusted HR (95% CI) | P-value |
|--------------------------|--------------|---------------------|-----------------|------------------------|---------|-----------------------|---------|
| <b>HFE H63D</b>          |              |                     |                 |                        |         |                       |         |
| rs1799945                |              |                     |                 |                        |         |                       |         |
| CC                       | 277          | 134                 | 0.900           | Ref                    |         | Ref                   |         |
| CG                       | 56           | 26                  |                 | 0.83 (0.51-1.34)       | 0.450   | 0.89 (0.55-1.46)      | 0.660   |
| CT                       | 2            | 1                   |                 | 0.71 (0.10-5.19)       | 0.730   | 0.50 (0.07-3.70)      | 0.500   |
| GG                       | 2            | 1                   |                 | 0.46 (0.06-3.42)       | 0.450   | 0.39 (0.05-2.86)      | 0.350   |
| Any G/T (CG+CT+GG)       | 58           | 27                  | 0.890           | 0.80 (0.50-1.30)       | 0.380   | 0.86 (0.52-1.39)      | 0.530   |
| <b>CYP17</b>             |              |                     |                 |                        |         |                       |         |
| rs743572                 |              |                     |                 |                        |         |                       |         |
| AA                       | 68           | 35                  | 0.380           | Ref                    |         | Ref                   |         |
| AG                       | 156          | 81                  |                 | 1.13 (0.74-1.71)       | 0.570   | 1.09 (0.72-1.67)      | 0.680   |
| GG                       | 60           | 24                  |                 | 0.92 (0.53-1.69)       | 0.780   | 0.93 (0.53-1.65)      | 0.830   |
| GT                       | 23           | 13                  |                 | 1.32 (0.66-2.64)       | 0.440   | 1.47 (0.72-2.98)      | 0.290   |
| AT                       | 32           | 10                  |                 | 0.55 (0.27-1.14)       | 0.110   | 0.52 (0.25-1.08)      | 0.082   |
| TT                       | 1            | 0                   |                 | 0.00 (0.00-inf)        | 1.000   | 0.00 (0.00-inf)       | 1.000   |
| Any G/T (AG+GG+GT+AT+TT) | 272          | 128                 | 0.760           | 1.02 (0.69-1.51)       | 0.940   | 1.00 (0.67-1.49)      | 1.000   |
| <b>hTERT</b>             |              |                     |                 |                        |         |                       |         |
| rs2075786                |              |                     |                 |                        |         |                       |         |
| AA                       | 108          | 48                  | 0.570           | Ref                    |         | Ref                   |         |
| AG                       | 161          | 86                  |                 | 1.35 (0.92-1.99)       | 0.130   | 1.32 (0.90-1.98)      | 0.150   |
| GG                       | 70           | 33                  |                 | 1.54 (0.95-2.48)       | 0.079   | 1.46 (0.91-2.37)      | 0.120   |
| Any G (AG+GG)            | 231          | 115                 | 0.300           | 1.39 (0.96-2.01)       | 0.080   | 1.36 (0.94-1.96)      | 0.100   |
| <b>PPP2R2B</b>           |              |                     |                 |                        |         |                       |         |
| rs10477307               |              |                     |                 |                        |         |                       |         |
| GG                       | 129          | 70                  | 0.280           | Ref                    |         | Ref                   |         |
| GA                       | 166          | 72                  |                 | 0.77 (0.55-1.08)       | 0.130   | 0.75 (0.53-1.05)      | 0.096   |
| AA                       | 43           | 20                  |                 | 0.83 (0.49-1.42)       | 0.500   | 0.85 (0.49-1.47)      | 0.560   |
| Any A(GA+AA)             | 209          | 92                  | 0.110           | 0.78 (0.57-1.08)       | 0.140   | 0.77 (0.55-1.06)      | 0.110   |
| <b>KIF20A</b>            |              |                     |                 |                        |         |                       |         |
| rs10038448               |              |                     |                 |                        |         |                       |         |
| CC                       | 213          | 99                  | 0.480           | Ref                    |         | Ref                   |         |
| CG                       | 112          | 57                  |                 | 1.22 (0.86-1.72)       | 0.270   | 1.33 (0.94-1.90)      | 0.110   |
| GG                       | 15           | 7                   |                 | 1.46 (0.65-3.27)       | 0.350   | 1.63 (0.73-3.67)      | 0.240   |
| Any G (CG+GG)            | 127          | 64                  | 0.240           | 1.24 (0.88-1.73)       | 0.220   | 1.36 (0.96-1.92)      | 0.080   |
| <b>TGFB1/CCDC</b>        |              |                     |                 |                        |         |                       |         |
| 97 rs12980942            |              |                     |                 |                        |         |                       |         |
| GG                       | 289          | 145                 | 0.290           | Ref                    |         | Ref                   |         |
| GA                       | 46           | 15                  |                 | 0.68 (0.39-1.20)       | 0.190   | 0.66 (0.37-1.18)      | 0.160   |

|                    |     |     |              |                           |              |                      |              |
|--------------------|-----|-----|--------------|---------------------------|--------------|----------------------|--------------|
| AA                 | 4   | 3   |              | 1.57 ( 0.44-              | 0.500        | 1.13 (0.32-4.03)     | 0.850        |
| Any A<br>(GA+AA)   | 50  | 18  | 0.180        | 5.28)<br>0.75 (0.44-1.27) | 0.280        | 0.71 (0.41-1.21)     | 0.210        |
| <b>XRCC5</b>       |     |     |              |                           |              |                      |              |
| rs1051685          |     |     |              |                           |              |                      |              |
| AA                 | 176 | 90  | <b>0.040</b> | Ref                       |              | Ref                  |              |
| AG                 | 132 | 58  |              | 0.65 (0.46-0.92)          | <b>0.016</b> | 0.69 (0.48-0.99)     | <b>0.043</b> |
| GG                 | 32  | 15  |              | 0.85 (0.48-1.51)          | 0.570        | 0.94 (0.56-1.69)     | 0.850        |
| Any G<br>(AG+GG)   | 164 | 73  | <b>0.015</b> | 0.68 (0.49-0.95)          | <b>0.023</b> | 0.73 (0.52-1.02)     | 0.068        |
| <b>TNF</b>         |     |     |              |                           |              |                      |              |
| rs3093662          |     |     |              |                           |              |                      |              |
| AA                 | 273 | 136 | 0.260        | Ref                       |              | Ref                  |              |
| AG                 | 62  | 26  |              | 1.22 (0.76-1.98)          | 0.410        | 1.11 (0.68-1.80)     | 0.670        |
| GG                 | 4   | 1   |              | 0.15 (0.02-1.10)          | 0.062        | 0.16 (0.02-1.20)     | 0.075        |
| Any G<br>(AG+GG)   | 66  | 27  | 0.810        | 0.97 (0.61-1.52)          | 0.880        | 0.90 (0.57-1.44)     | 0.670        |
| <b>BCL2</b>        |     |     |              |                           |              |                      |              |
| rs1531697          |     |     |              |                           |              |                      |              |
| TT                 | 168 | 76  | 0.560        | Ref                       |              | Ref                  |              |
| TA                 | 139 | 72  |              | 1.12 (0.80-1.56)          | 0.510        | 1.10 (0.78-1.53)     | 0.590        |
| AA                 | 31  | 14  |              | 1.00 (0.54-1.87)          | 0.999        | 0.80 (0.42-1.52)     | 0.490        |
| Any A<br>(TA+AA)   | 170 | 86  | 0.660        | 1.10 (0.80-1.52)          | 0.560        | 1.05 (0.76-1.46)     | 0.770        |
| <b>CHFR</b>        |     |     |              |                           |              |                      |              |
| rs11610954         |     |     |              |                           |              |                      |              |
| CC                 | 291 | 137 | 0.270        | Ref                       |              | Ref                  |              |
| CT                 | 43  | 23  |              | 1.46 (0.90-2.37)          | 0.120        | 1.41 (0.87-2.32)     | 0.160        |
| TT                 | 6   | 3   |              | 1.24 (0.38-4.04)          | 0.720        | 1.11 (0.34-3.63)     | 0.860        |
| Any T<br>(CT+TT)   | 49  | 26  | 0.110        | 1.44 (0.90-2.29)          | 0.130        | 1.38 (0.86-2.21)     | 0.180        |
| <b>CDC25C</b>      |     |     |              |                           |              |                      |              |
| rs6874130          |     |     |              |                           |              |                      |              |
| GG                 | 104 | 48  | 0.880        | Ref                       |              | Ref                  |              |
| GC                 | 183 | 88  |              | 1.05 (0.73-1.51)          | 0.780        | 1.11 (0.77-1.61)     | 0.580        |
| CC                 | 53  | 27  |              | 1.01 (0.62-1.65)          | 0.970        | 1.20 (0.72-1.99)     | 0.480        |
| Any<br>C(GC+CC)    | 236 | 115 | 0.620        | 1.04 (0.74-1.48)          | 0.810        | 1.13 (0.79-1.61)     | 0.520        |
| <b>ATM</b>         |     |     |              |                           |              |                      |              |
| rs1800057          |     |     |              |                           |              |                      |              |
| CC                 | 330 | 155 | 0.520        | Ref                       |              | Ref                  |              |
| CG                 | 10  | 8   |              | 1.44 (0.62-<br>3.31)      | 0.390        | 1.47 (0.63-<br>3.49) | 0.370        |
| <b>CYP1A1 Msp1</b> |     |     |              |                           |              |                      |              |
| rs4646903          |     |     |              |                           |              |                      |              |
| AA                 | 230 | 112 | <b>0.007</b> | Ref                       |              | Ref                  |              |
| AG                 | 85  | 40  |              | 0.68 (0.46-1.00)          | 0.053        | 0.68 (0.46-1.00)     | 0.051        |
| GG                 | 19  | 10  |              | 2.05 (1.02-4.11)          | <b>0.043</b> | 2.03 (1.01-4.08)     | <b>0.047</b> |
| Any G<br>(AG+GG)   | 104 | 50  | 0.240        | 0.79 (0.55-1.13)          | 0.200        | 0.79 (0.55-1.13)     | 0.200        |

|                   |     |     |              |                  |              |                  |              |   |
|-------------------|-----|-----|--------------|------------------|--------------|------------------|--------------|---|
| TTC28             |     |     |              |                  |              |                  |              |   |
| rs9608696         | 329 | 156 | -            | -                | -            | -                | -            | - |
| TT                | 0   | 0   |              |                  |              |                  |              |   |
| GG                |     |     |              |                  |              |                  |              |   |
| CDC25C            |     |     |              |                  |              |                  |              |   |
| rs3734166         |     |     |              |                  |              |                  |              |   |
| GG                | 185 | 77  | 0.110        | Ref              |              | Ref              |              |   |
| GA                | 133 | 76  |              | 1.41 (1.01-1.98) | <b>0.045</b> | 1.49(1.05- 2.11) | <b>0.023</b> |   |
| AA                | 20  | 8   |              | 1.53 (0.72-3.28) | 0.270        | 1.99 (0.92-4.31) | 0.081        |   |
| Any A<br>(GA+AA)  | 153 | 84  | <b>0.035</b> | 1.42 (1.02-1.98) | <b>0.037</b> | 1.53 (1.09-2.14) | <b>0.015</b> |   |
| GSTM1             |     |     |              |                  |              |                  |              |   |
| + (Present)       | 275 | 129 | 0.260        | Ref              |              | Ref              |              |   |
| - (Null)          | 55  | 30  |              | 1.41(0.90- 2.21) | 0.130        | 1.36(0.86- 2.16) | 0.190        |   |
| GSTT1             |     |     |              |                  |              |                  |              |   |
| + (Present)       | 256 | 126 | 0.082        | Ref              |              | Ref              |              |   |
| - (Null)          | 74  | 33  |              | 0.65 (0.43-0.97) | <b>0.036</b> | 0.65(0.43- 0.99) | <b>0.044</b> |   |
| *Adjusted for sex |     |     |              |                  |              |                  |              |   |
