# Supplementary material for: Influence of Genetic Polymorphisms on the Age at Cancer Diagnosis in a Homogenous Lynch Syndrome Cohort of Individuals Carrying the MLH1:c.1528C>T South African Founder Variant
Source: MDPI journal article supplement (doi:10.3390/biomedicines12102201), 2024-09-27
Supplement: s1 [file Supplementary Table S5.pdf › Supplementary Table S5.pdf]

**Supplementary Table S5.** Multivariate and sex-adjusted (as confounder) Cox regression analysis by genotype for any cancer. Note: Significant polymorphism genotypes are in Bold. Abbreviations: HR: Hazards Ratio, CI: Confidence Interval, Ref: Reference genotype.

| Polymorphism                | Genotype (N) | Cancer affected (N) | HR (95% CI)      | P-value | #P-value | *Adjusted HR (95% CI) | P-value | #P-value |
|-----------------------------|--------------|---------------------|------------------|---------|----------|-----------------------|---------|----------|
| HFE H63D<br>rs1799945       |              |                     |                  |         |          |                       |         |          |
| CC                          | 277          | 134                 | Ref              |         |          | Ref                   |         |          |
| CG                          | 56           | 26                  | 0.96 (0.58-1.59) | 0.870   | 0.982    | 1.03 (0.62-1.73)      | 0.900   | 0.983    |
| CT                          | 2            | 1                   | 1.20 (0.15-9.61) | 0.870   | 0.982    | 0.85 (0.11-6.78)      | 0.880   | 0.983    |
| GG                          | 2            | 1                   | 0.36 (0.05-2.83) | 0.330   | 0.600    | 0.27 (0.03-2.19)      | 0.220   | 0.513    |
| CYP17<br>rs743572           |              |                     |                  |         |          |                       |         |          |
| AA                          | 68           | 35                  | Ref              |         |          | Ref                   |         |          |
| AG                          | 156          | 81                  | 1.53 (0.95-2.46) | 0.080   | 0.342    | 1.56 (0.96-2.53)      | 0.070   | 0.267    |
| GG                          | 60           | 24                  | 1.01 (0.56-1.82) | 0.980   | 0.999    | 1.00 (0.55-1.80)      | 1.000   | 0.999    |
| GT                          | 23           | 13                  | 1.83 (0.87-3.84) | 0.110   | 0.346    | 2.01 (0.94-4.32)      | 0.072   | 0.267    |
| AT                          | 32           | 10                  | 0.48 (0.21-1.09) | 0.080   | 0.342    | 0.48 (0.21-1.08)      | 0.076   | 0.267    |
| TT                          | 1            | 0                   | 0.00 (0.00-inf)  | 1.000   | 0.999    | 0.00 (0.00-inf)       | 1.000   | 0.999    |
| hTERT<br>rs2075786          |              |                     |                  |         |          |                       |         |          |
| AA                          | 108          | 48                  | Ref              |         |          | Ref                   |         |          |
| AG                          | 161          | 86                  | 1.20 (0.80-1.78) | 0.380   | 0.634    | 1.21 (0.80-1.82)      | 0.360   | 0.631    |
| GG                          | 70           | 33                  | 1.39 (0.85-2.29) | 0.190   | 0.494    | 1.44 (0.87-2.37)      | 0.160   | 0.419    |
| PPP2R2B<br>rs10477307       |              |                     |                  |         |          |                       |         |          |
| GG                          | 129          | 70                  | Ref              |         |          | Ref                   |         |          |
| GA                          | 166          | 72                  | 0.73 (0.50-1.07) | 0.110   | 0.345    | 0.71 (0.48-1.05)      | 0.088   | 0.279    |
| AA                          | 43           | 20                  | 0.74 (0.40-1.36) | 0.330   | 0.600    | 0.76 (0.41-1.40)      | 0.380   | 0.631    |
| KIF20A<br>rs10038448        |              |                     |                  |         |          |                       |         |          |
| CC                          | 213          | 99                  | Ref              |         |          | Ref                   |         |          |
| GC                          | 112          | 57                  | 0.85 (0.48-1.49) | 0.560   | 0.737    | 0.92 (0.51-1.65)      | 0.780   | 0.959    |
| GG                          | 15           | 7                   | 1.09 (0.28-4.22) | 0.900   | 0.989    | 0.95 (0.25-3.53)      | 0.940   | 0.993    |
| TGFB1/CCDC<br>97 rs12980942 |              |                     |                  |         |          |                       |         |          |
| GG                          | 289          | 145                 | Ref              |         |          | Ref                   |         |          |
| GA                          | 46           | 15                  | 0.60 (0.33-1.09) | 0.094   | 0.346    | 0.57 (0.31-1.05)      | 0.071   | 0.267    |
| AA                          | 4            | 3                   | 2.92(0.72-11.77) | 0.130   | 0.376    | 2.22 (0.56-8.91)      | 0.260   | 0.530    |
| XRCC5<br>rs1051685          |              |                     |                  |         |          |                       |         |          |
| AA                          | 176          | 90                  | Ref              |         |          | Ref                   |         |          |

|                          |     |     |                  |              |       |                  |              |       |
|--------------------------|-----|-----|------------------|--------------|-------|------------------|--------------|-------|
| AG                       | 132 | 58  | 0.58 (0.40-0.84) | <b>0.005</b> | 0.157 | 0.62 (0.42-0.92) | <b>0.017</b> | 0.267 |
| GG                       | 32  | 15  | 0.79 (0.42-1.48) | 0.460        | 0.676 | 0.90 (0.48-1.68) | 0.730        | 0.947 |
| TNF rs3093662            |     |     |                  |              |       |                  |              |       |
| AA                       | 273 | 136 | Ref              |              |       | Ref              |              |       |
| AG                       | 62  | 26  | 1.35 (0.82-2.23) | 0.240        | 0.522 | 1.17 (0.70-1.95) | 0.550        | 0.797 |
| GG                       | 4   | 1   | 0.41 (0.05-3.19) | 0.390        | 0.634 | 0.36 (0.05-2.78) | 0.330        | 0.630 |
| BCL2<br>rs1531697        |     |     |                  |              |       |                  |              |       |
| TT                       | 168 | 76  | Ref              |              |       | Ref              |              |       |
| TA                       | 139 | 72  | 1.10 (0.76-1.59) | 0.610        | 0.763 | 1.10 (0.76-1.59) | 0.620        | 0.830 |
| AA                       | 31  | 14  | 0.53 (0.26-1.07) | 0.078        | 0.342 | 0.44 (0.22-0.90) | <b>0.024</b> | 0.267 |
| CHFR<br>rs11610954       |     |     |                  |              |       |                  |              |       |
| CC                       | 291 | 137 | Ref              |              |       | Ref              |              |       |
| CT                       | 43  | 23  | 1.76 (1.04-2.99) | <b>0.037</b> | 0.333 | 1.73 (1.00-2.98) | <b>0.048</b> | 0.267 |
| TT                       | 6   | 3   | 1.67 (0.49-5.65) | 0.410        | 0.639 | 1.53 (0.46-5.18) | 0.490        | 0.780 |
| CDC25C<br>rs6874130      |     |     |                  |              |       |                  |              |       |
| GG                       | 104 | 48  | Ref              |              |       | Ref              |              |       |
| GC                       | 183 | 88  | 1.02 (0.65-1.59) | 0.940        | 0.998 | 0.94 (0.60-1.47) | 0.790        | 0.959 |
| CC                       | 53  | 27  | 0.86 (0.44-1.67) | 0.650        | 0.787 | 0.84 (0.43-1.63) | 0.600        | 0.830 |
| ATM<br>rs1800057         |     |     |                  |              |       |                  |              |       |
| CC                       | 330 | 155 | Ref              |              |       | Ref              |              |       |
| CG                       | 10  | 8   | 1.33 (0.55-3.26) | 0.530        | 0.716 | 1.08 (0.44-2.64) | 0.870        | 0.983 |
| CYP1A1 Msp1<br>rs4646903 |     |     |                  |              |       |                  |              |       |
| AA                       | 230 | 112 | Ref              |              |       | Ref              |              |       |
| AG                       | 85  | 40  | 0.64 (0.42-0.98) | <b>0.039</b> | 0.333 | 0.64 (0.42-0.97) | <b>0.036</b> | 0.267 |
| GG                       | 19  | 10  | 1.47 (0.67-3.22) | 0.340        | 0.600 | 1.29 (0.58-2.89) | 0.530        | 0.797 |
| TTC28<br>rs9608696       |     |     |                  |              |       |                  |              |       |
| TT                       | 329 | 156 | -                | -            |       | -                | -            |       |
| GG                       | 0   | 0   |                  |              |       |                  |              |       |
| CDC25C<br>rs3734166      |     |     |                  |              |       |                  |              |       |
| GG                       | 185 | 77  | Ref              |              |       | Ref              |              |       |
| GA                       | 133 | 76  | 1.69 (0.99-2.87) | 0.053        | 0.342 | 1.70 (0.99-2.92) | 0.056        | 0.267 |
| AA                       | 20  | 8   | 1.59 (0.42-6.01) | 0.490        | 0.701 | 2.20 (0.60-8.07) | 0.230        | 0.513 |
| GSTM1<br>+ (Present)     | 275 | 129 | Ref              |              |       | Ref              |              |       |
| - (Null)                 | 55  | 30  | 1.69 (1.03-2.75) | <b>0.036</b> | 0.522 | 1.52 (0.93-2.50) | 0.096        | 0.279 |

|                                                                                          |     |     |                  |       |       |                  |       |       |
|------------------------------------------------------------------------------------------|-----|-----|------------------|-------|-------|------------------|-------|-------|
|                                                                                          |     |     |                  |       |       |                  |       |       |
| GSTT1                                                                                    |     |     |                  |       |       |                  |       |       |
| + (Present)                                                                              | 256 | 126 | Ref              |       |       | Ref              |       |       |
| - (Null)                                                                                 | 74  | 33  | 0.76 (0.49-1.20) | 0.250 | 0.494 | 0.75 (0.47-1.18) | 0.210 | 0.513 |
| *Adjusted for gender #Corrected for multiple testing using the Benjamin-Hochberg method. |     |     |                  |       |       |                  |       |       |
