# Supplementary material for: Influence of Genetic Polymorphisms on the Age at Cancer Diagnosis in a Homogenous Lynch Syndrome Cohort of Individuals Carrying the MLH1:c.1528C>T South African Founder Variant
Source: MDPI journal article supplement (doi:10.3390/biomedicines12102201), 2024-09-27
Supplement: s1 [file Supplementary Table S6.pdf › Supplementary Table S6.pdf]

**Supplementary Table S6.** Comparison of Kaplan-Meier survival by genotype, univariate and sex-adjusted (as confounder) Cox regression analysis by genotype for CRC. Note: Significant polymorphism genotypes are in Bold. Abbreviations: HR. Hazards Ratio, CI. Confidence Interval, Ref. Reference genotype.

| Polymorphism             | Genotype (N) | Cancer events | Log-rank test P | Univariate HR (95% CI) | P-value | *Adjusted HR (95% CI) | P-value |
|--------------------------|--------------|---------------|-----------------|------------------------|---------|-----------------------|---------|
| <b>HFE H63D</b>          |              |               |                 |                        |         |                       |         |
| rs1799945                |              |               |                 |                        |         |                       |         |
| CC                       | 249          | 134           | 0.900           | Ref                    |         | Ref                   |         |
| CG                       | 50           | 26            |                 | 0.89 (0.53-1.50)       | 0.670   | 1.00 (0.59-1.70)      | 0.990   |
| CT                       | 2            | 1             |                 | 0.64 (0.09-4.76)       | 0.670   | 0.47 (0.06-3.47)      | 0.460   |
| GG                       | 2            | 1             |                 | 0.51 (0.07-3.78)       | 0.510   | 0.45 (0.06-3.33)      | 0.430   |
| Any G/T (CG+CT+GG)       | 52           | 21            | 0.890           | 0.87 (0.52-1.45)       | 0.580   | 0.95 (0.56-1.60)      | 0.840   |
| <b>CYP17</b>             |              |               |                 |                        |         |                       |         |
| rs743572                 |              |               |                 |                        |         |                       |         |
| AA                       | 68           | 35            | 0.380           | Ref                    |         | Ref                   |         |
| AG                       | 156          | 81            |                 | 1.18 (0.74- 1.90)      | 0.490   | 1.18 ( 0.73- 1.91)    | 0.500   |
| GG                       | 60           | 24            |                 | 1.06 (0.56- 2.01)      | 0.850   | 1.14 (0.60- 2.18)     | 0.690   |
| GT                       | 23           | 13            |                 | 1.29 (0.57- 2.88)      | 0.540   | 1.45 (0.64-3.29)      | 0.370   |
| AT                       | 32           | 10            |                 | 0.51 (0.20-1.27)       | 0.150   | 0.48 (0.19- 1.21)     | 0.120   |
| TT                       | 1            | 0             |                 | 0.000 (0.00-inf)       | 1.000   | 0.000 (0.00-inf)      | 1.000   |
| Any G/T (AG+GG+GT+AT+TT) | 248          | 104           | 0.580           | 1.09 (0.69-1.71)       | 0.730   | 1.01 (0.70-1.74)      | 0.680   |
| <b>hTERT</b>             |              |               |                 |                        |         |                       |         |
| rs2075786                |              |               |                 |                        |         |                       |         |
| AA                       | 98           | 48            | 0.570           | Ref                    |         | Ref                   |         |
| AG                       | 143          | 86            |                 | 1.24 ( 0.82-1.88)      | 0.310   | 1.18 (0.78-1.79)      | 0.430   |
| GG                       | 64           | 33            |                 | 1.43 ( 0.85-2.39)      | 0.180   | 1.31 (0.78- 2.21)     | 0.310   |
| Any G (AG+GG)            | 207          | 91            | 0.360           | 1.29 (0.87-1.91)       | 0.210   | 1.21 (0.82-1.80)      | 0.340   |
| <b>PPP2R2B</b>           |              |               |                 |                        |         |                       |         |
| rs10477307               |              |               |                 |                        |         |                       |         |
| GG                       | 116          | 70            | 0.280           | Ref                    |         | Ref                   |         |
| GA                       | 148          | 72            |                 | 0.76 (0.52- 1.15)      | 0.160   | 0.73 (0.50-1.08)      | 0.110   |
| AA                       | 40           | 20            |                 | 0.85 (0.48- 1.56)      | 0.590   | 0.85 (0.48-1.54)      | 0.600   |
| Any A (GA+AA)            | 188          | 71            | 0.140           | 0.78 (0.54-1.12)       | 0.180   | 0.75 (0.53-1.09)      | 0.130   |
| <b>KIF20A</b>            |              |               |                 |                        |         |                       |         |
| rs10038448               |              |               |                 |                        |         |                       |         |
| CC                       | 195          | 99            | 0.480           | Ref                    |         | Ref                   |         |
| GC                       | 98           | 57            |                 | 1.21 (0.82- 1.77)      | 0.340   | 1.31 (0.88- 1.94)     | 0.180   |
| GG                       | 13           | 7             |                 | 1.17 (0.47-2.94)       | 0.740   | 1.33 (0.53- 3.38)     | 0.540   |
| Any C (GC+GG)            | 111          | 48            | 0.380           | 1.20 (0.83-1.75)       | 0.340   | 1.31 (0.90-1.92)      | 0.160   |
| <b>TGFB1/CCDC</b>        |              |               |                 |                        |         |                       |         |
| 97 rs12980942            |              |               |                 |                        |         |                       |         |
| GG                       | 259          | 145           | 0.290           | Ref                    |         | Ref                   |         |
| GA                       | 42           | 15            |                 | 0.56 (0.30-1.08)       | 0.083   | 0.59 (0.30-1.13)      | 0.110   |

|                      |     |     |              |                   |              |                   |              |
|----------------------|-----|-----|--------------|-------------------|--------------|-------------------|--------------|
| AA                   | 4   | 3   |              | 1.39 (0.41-4.74)  | 0.600        | 1.06 (0.30-3.71)  | 0.930        |
| Any A<br>(GA+AA)     | 46  | 14  | 0.110        | 0.64 (0.36-1.16)  | 0.140        | 0.65 (0.36-1.17)  | 0.150        |
| <b>XRCC5</b>         |     |     |              |                   |              |                   |              |
| rs1051685            |     |     |              |                   |              |                   |              |
| AA                   | 163 | 90  | <b>0.040</b> | Ref               |              | Ref               |              |
| AG                   | 112 | 58  |              | 0.59 (0.40-0.89)  | <b>0.012</b> | 0.61 (0.41- 0.92) | <b>0.019</b> |
| GG                   | 31  | 15  |              | 0.79 (0.43-1.46)  | 0.460        | 0.93 (0.51-1.71)  | 0.830        |
| Any G<br>(AG+GG)     | 143 | 52  | <b>0.019</b> | 0.64 (0.44-0.92)  | <b>0.017</b> | 0.67 (0.46-0.98)  | <b>0.038</b> |
| <b>TNF rs3093662</b> |     |     |              |                   |              |                   |              |
| AA                   | 243 | 136 | 0.260        | Ref               |              | Ref               |              |
| AG                   | 58  | 26  |              | 1.06 (0.64- 1.75) | 0.820        | 0.96 (0.58- 1.59) | 0.880        |
| GG                   | 4   | 1   |              | 0.22 (0.03- 1.62) | 0.140        | 0.24 (0.03- 1.72) | 0.150        |
| Any G<br>(AG+GG)     | 62  | 23  | 0.480        | 0.89 (0.55-1.45)  | 0.650        | 0.84 (0.52-1.36)  | 0.480        |
| <b>BCL2</b>          |     |     |              |                   |              |                   |              |
| rs1531697            |     |     |              |                   |              |                   |              |
| TT                   | 117 | 72  |              | 1.11 (0.76-1.61)  | 0.590        | 1.06 (0.72- 1.54) | 0.780        |
| TA                   | 28  | 14  |              | 0.98 (0.50-1.96)  | 0.970        | 0.73 (0.36- 1.47) | 0.380        |
| AA                   | 145 | 61  | 0.840        | 1.09 (0.76-1.56)  | 0.640        | 0.99 (0.69-1.43)  | 0.970        |
| Any A<br>(TA+AA)     |     |     |              |                   |              |                   |              |
| <b>CHFR</b>          |     |     |              |                   |              |                   |              |
| rs11610954           |     |     |              |                   |              |                   |              |
| CC                   | 260 | 137 | 0.270        | Ref               |              | Ref               |              |
| CT                   | 40  | 23  |              | 1.55 (0.93- 2.60) | 0.095        | 1.54 (0.92-2.59)  | 0.100        |
| TT                   | 6   | 3   |              | 1.35 (0.41- 4.44) | 0.620        | 1.26 (0.38-4.10)  | 0.710        |
| Any T (CT+TT)        | 46  | 23  | 0.120        | 1.53 (0.93-2.50)  | 0.094        | 1.50 (0.91-2.47)  | 0.110        |
| <b>CDC25C</b>        |     |     |              |                   |              |                   |              |
| rs6874130            |     |     |              |                   |              |                   |              |
| GG                   | 96  | 48  | 0.880        | Ref               |              | Ref               |              |
| GC                   | 162 | 88  |              | 1.02 (0.68- 1.53) | 0.910        | 1.12 (0.74- 1.68) | 0.600        |
| CC                   | 48  | 27  |              | 1.08 (0.63- 1.85) | 0.770        | 1.41 (0.80- 2.45) | 0.230        |
| Any C<br>(GC+CC)     | 210 | 89  | 0.840        | 1.04 (0.71-1.53)  | 0.850        | 1.17 (0.79-1.74)  | 0.440        |
| <b>ATM</b>           |     |     |              |                   |              |                   |              |
| rs1800057            |     |     |              |                   |              |                   |              |
| CC                   | 300 | 155 | 0.520        | Ref               |              | Ref               |              |
| CG                   | 6   | 8   |              | 1.99 (0.68-5.85)  | 0.210        | 1.63 (0.55- 4.87) | 0.380        |
| <b>CYP1A1 Msp1</b>   |     |     |              |                   |              |                   |              |
| rs4646903            |     |     |              |                   |              |                   |              |
| AA                   | 204 | 112 | <b>0.007</b> | Ref               |              | Ref               |              |
| AG                   | 78  | 40  |              | 0.68 (0.44-1.04)  | 0.072        | 0.65 (0.45- 1.00) | <b>0.051</b> |
| GG                   | 18  | 10  |              | 1.66 (0.81-3.43)  | 0.170        | 1.77 (0.85- 3.66) | 0.130        |
| Any G<br>(AG+GG)     | 96  | 42  | 0.310        | 0.77 (0.52-1.15)  | 0.200        | 0.76 (0.51-1.13)  | 0.170        |
| <b>TTC28</b>         |     |     |              |                   |              |                   |              |
| rs9608696            |     |     |              |                   |              |                   |              |
| TT                   | 329 | 156 | -            | -                 | -            | -                 | -            |
|                      | 0   | 0   |              |                   |              |                   |              |

---

GG

CDC25C

rs3734166

|                  |     |    |       |                   |       |                   |              |
|------------------|-----|----|-------|-------------------|-------|-------------------|--------------|
| GG               | 171 | 77 | 0.110 | Ref               |       | Ref               |              |
| GA               | 115 | 76 |       | 1.41 (0.97- 2.05) | 0.075 | 1.50 (1.02- 2.21) | <b>0.039</b> |
| AA               | 18  | 8  |       | 1.78 (0.75- 4.23) | 0.190 | 2.27 (0.97- 5.43) | 0.066        |
| Any A<br>(GA+AA) | 133 | 64 | 0.056 | 1.44 (0.99-2.08)  | 0.053 | 1.55 (1.06-2.26)  | <b>0.022</b> |

(GA+AA)

GSTM1

|             |     |     |       |                   |       |                   |       |
|-------------|-----|-----|-------|-------------------|-------|-------------------|-------|
| + (Present) | 249 | 129 | 0.056 | Ref               |       | Ref               |       |
| - (Null)    | 50  | 30  |       | 1.56 (0.98- 2.49) | 0.061 | 1.52 (0.94- 2.49) | 0.087 |

GSTT1

|             |     |     |       |                   |              |                  |              |
|-------------|-----|-----|-------|-------------------|--------------|------------------|--------------|
| + (Present) | 232 | 126 | 0.130 | Ref               |              | Ref              |              |
| - (Null)    | 67  | 33  |       | 0.62 (0.40- 0.99) | <b>0.044</b> | 0.63 (0.40-1.00) | <b>0.048</b> |

\*Adjusted for sex

---
